# Supplementary material for: Novel alkaline earth metal–organic frameworks with thiophene groups for selective detection of Fe3+
Source: Royal Society of Chemistry journal article supplement (doi:10.1039/d0ce00990c), 2020-01-01
Supplement: d0ce00990c1.pdf [file d0ce00990c1.pdf]

*Supporting Information for*

**Novel alkaline earth metal-organic frameworks with thiophene group for  
selective Detection of Fe<sup>3+</sup>**

Jun Yao, Yan-E Liu, Li-Bo Yang, Ai-Na Dou, Cheng-Fu Hou, Quan-Qing Xu, Bo Huang\* and Ai-Xin  
Zhu\*

*Faculty of Chemistry and Chemical Engineering, Yunnan Normal University, Kunming 650500, China.*

E-mail: [huangbo15@foxmail.com](mailto:huangbo15@foxmail.com) (Bo Huang) and [zaxchem@126.com](mailto:zaxchem@126.com) (Ai-Xin Zhu);

**Table S1** Crystal data and structure refinements for **1-3**

| Compounds                                                                 | <b>1</b>                                                                                      | <b>2</b>                                                         | <b>3</b>                                                          |
|---------------------------------------------------------------------------|-----------------------------------------------------------------------------------------------|------------------------------------------------------------------|-------------------------------------------------------------------|
| Formula                                                                   | C <sub>29</sub> H <sub>37</sub> Mg <sub>2</sub> N <sub>3</sub> O <sub>13</sub> S <sub>4</sub> | C <sub>13</sub> H <sub>13</sub> CaNO <sub>5</sub> S <sub>2</sub> | C <sub>13</sub> H <sub>13</sub> NO <sub>5</sub> S <sub>2</sub> Sr |
| Formula weight                                                            | 812.47                                                                                        | 367.44                                                           | 414.98                                                            |
| Crystal system                                                            | Monoclinic                                                                                    | Orthorhombic                                                     | Orthorhombic                                                      |
| Space group                                                               | <i>P2<sub>1</sub>/m</i>                                                                       | <i>Pmc2<sub>1</sub></i>                                          | <i>Pnma</i>                                                       |
| <i>a</i> (Å)                                                              | 10.759(2)                                                                                     | 22.642(3)                                                        | 7.3261(15)                                                        |
| <i>b</i> (Å)                                                              | 19.330(4)                                                                                     | 9.7853(12)                                                       | 22.720(5)                                                         |
| <i>c</i> (Å)                                                              | 12.307(3)                                                                                     | 6.8909(8)                                                        | 9.936(2)                                                          |
| $\alpha$ (deg)                                                            | 90                                                                                            | 90                                                               | 90                                                                |
| $\beta$ (deg)                                                             | 100.26(3)                                                                                     | 90                                                               | 90                                                                |
| $\gamma$ (deg)                                                            | 90                                                                                            | 90                                                               | 90                                                                |
| <i>V</i> (Å <sup>3</sup> )                                                | 2518.7(9)                                                                                     | 1526.7(3)                                                        | 1653.8(6)                                                         |
| <i>Z</i>                                                                  | 2                                                                                             | 4                                                                | 4                                                                 |
| <i>D<sub>c</sub></i> (g·cm <sup>-3</sup> )                                | 1.071                                                                                         | 1.599                                                            | 1.667                                                             |
| $\mu$ (mm <sup>-1</sup> )                                                 | 0.262                                                                                         | 0.706                                                            | 3.532                                                             |
| GOF                                                                       | 1.064                                                                                         | 1.115                                                            | 1.243                                                             |
| <i>R</i> <sub>1</sub> [ <i>I</i> > 2 $\sigma$ ( <i>I</i> )] <sup>a</sup>  | 0.1072                                                                                        | 0.0393                                                           | 0.0660                                                            |
| <i>WR</i> <sub>2</sub> [ <i>I</i> > 2 $\sigma$ ( <i>I</i> )] <sup>b</sup> | 0.3159                                                                                        | 0.1070                                                           | 0.1625                                                            |
| <i>R</i> <sub>1</sub> [all data]                                          | 0.1944                                                                                        | 0.0412                                                           | 0.0742                                                            |
| <i>wR</i> <sub>2</sub> [all data]                                         | 0.3707                                                                                        | 0.1092                                                           | 0.1679                                                            |
| Diff peak, hole (e Å <sup>-3</sup> )                                      | 0.761, -0.394                                                                                 | 0.458, -0.344                                                    | 0.958, -0.852                                                     |

$$R_1 = \frac{\sum ||F_o| - |F_c||}{\sum |F_o|}, wR_2 = \left[ \frac{\sum w(F_o^2 - F_c^2)^2}{\sum w(F_o^2)^2} \right]^{1/2}$$

**Table S2** Selected bond lengths(Å) and angles(°) for **1**.

|                     |           |                     |            |
|---------------------|-----------|---------------------|------------|
| Mg(1)-O(1)          | 2.069(4)  | Mg(1)-O(1W)         | 2.161(6)   |
| Mg(1)-O(1)#1        | 2.069(4)  | Mg(1)-O(2W)         | 2.052(8)   |
| Mg(1)-O(3)          | 2.075(4)  | Mg(1)-O(3)#1        | 2.075(4)   |
| Mg(2)-O(1W)         | 2.074(5)  | Mg(2)-O(2)          | 2.025(5)   |
| Mg(2)-O(2)#1        | 2.025(5)  | Mg(2)-O(5)          | 2.053(6)   |
| Mg(2)-O(6)          | 2.034(6)  | Mg(2)-O(6)#1        | 2.034(6)   |
| O(1)-Mg(1)-O(1)#1   | 92.6(2)   | O(1)-Mg(1)-O(1W)    | 91.30(19)  |
| O(1)-Mg(1)-O(3)     | 88.34(16) | O(1)-Mg(1)-O(3)#1   | 178.97(19) |
| O(1)#1-Mg(1)-O(1W)  | 91.30(19) | O(1)#1-Mg(1)-O(3)   | 178.97(19) |
| O(1)#1-Mg(1)-O(3)#1 | 88.34(16) | O(2W)-Mg(1)-O(1)    | 88.1(2)    |
| O(2W)-Mg(1)-O(1)#1  | 88.1(2)   | O(2W)-Mg(1)-O(1W)   | 179.2(2)   |
| O(2W)-Mg(1)-O(3)    | 91.4(2)   | O(2W)-Mg(1)-O(3)#1  | 91.4(2)    |
| O(3)-Mg(1)-O(1W)    | 89.15(19) | O(3)-Mg(1)-O(3)#1   | 90.7(2)    |
| O(3)#1-Mg(1)-O(1W)  | 89.15(19) | O(2)-Mg(2)-O(1W)    | 92.8(2)    |
| O(2)-Mg(2)-O(5)     | 90.7(2)   | O(2)-Mg(2)-O(6)     | 88.7(2)    |
| O(2)-Mg(2)-O(6)#1   | 177.4(3)  | O(2)#1-Mg(2)-O(1W)  | 92.8(2)    |
| O(2)#1-Mg(2)-O(2)   | 93.8(3)   | O(2)#1-Mg(2)-O(5)   | 90.7(2)    |
| O(2)#1-Mg(2)-O(6)   | 177.4(3)  | O(2)#1-Mg(2)-O(6)#1 | 88.7(2)    |
| O(5)-Mg(2)-O(1W)    | 174.9(3)  | O(6)-Mg(2)-O(1W)    | 88.1(2)    |
| O(6)-Mg(2)-O(5)     | 88.2(2)   | O(6)-Mg(2)-O(6)#1   | 88.9(4)    |
| O(6)#1-Mg(2)-O(1W)  | 88.1(2)   | O(6)#1-Mg(2)-O(5)   | 88.2(2)    |

Symmetry code: #1: x, -y+1/2, z.

**Table S3** Selected bond lengths(Å) and angles(°) for **2**.

|                     |            |                     |            |
|---------------------|------------|---------------------|------------|
| Ca(1)-O(1)          | 2.402(4)   | Ca(1)-O(1)#3        | 2.402(4)   |
| Ca(1)-O(2)          | 2.604(4)   | Ca(1)-O(2)#1        | 2.341(4)   |
| Ca(1)-O(2)#2        | 2.341(4)   | Ca(1)-O(2)#3        | 2.604(4)   |
| Ca(1)-O(5)          | 2.468(5)   | Ca(1)-O(5)#4        | 2.495(5)   |
| Ca(2)-O(3)          | 2.633(4)   | Ca(2)-O(3)#5        | 2.361(4)   |
| Ca(2)-O(3)#6        | 2.361(4)   | Ca(2)-O(3)#8        | 2.633(4)   |
| Ca(2)-O(4)          | 2.410(4)   | Ca(2)-O(4)#8        | 2.410(4)   |
| Ca(2)-O(6)          | 2.437(5)   | Ca(2)-O(6)#7        | 2.405(5)   |
|                     |            |                     |            |
| O(1)-Ca(1)-O(2)     | 52.14(13)  | O(1)-Ca(1)-O(2)#3   | 103.52(14) |
| O(1)-Ca(1)-O(5)     | 80.69(13)  | O(1)-Ca(1)-O(5)#4   | 119.00(13) |
| O(1)#3-Ca(1)-O(1)   | 91.6(2)    | O(1)#3-Ca(1)-O(2)   | 103.52(14) |
| O(1)#3-Ca(1)-O(2)#3 | 52.14(13)  | O(1)#3-Ca(1)-O(5)   | 80.69(13)  |
| O(1)#3-Ca(1)-O(5)#4 | 119.00(13) | O(2)-Ca(1)-O(2)#3   | 72.50(17)  |
| O(2)#1-Ca(1)-O(1)   | 154.43(15) | O(2)#1-Ca(1)-O(1)#3 | 87.66(14)  |
| O(2)#1-Ca(1)-O(2)   | 152.20(11) | O(2)#1-Ca(1)-O(2)#2 | 82.27(19)  |
| O(2)#1-Ca(1)-O(2)#3 | 96.12(13)  | O(2)#1-Ca(1)-O(5)   | 73.96(13)  |
| O(2)#1-Ca(1)-O(5)#4 | 83.15(13)  | O(2)#2-Ca(1)-O(1)   | 87.66(14)  |
| O(2)#2-Ca(1)-O(1)#3 | 154.43(15) | O(2)#2-Ca(1)-O(2)   | 96.12(13)  |
| O(2)#2-Ca(1)-O(2)#3 | 152.20(11) | O(2)#2-Ca(1)-O(5)   | 73.96(13)  |
| O(2)#2-Ca(1)-O(5)#4 | 83.15(13)  | O(5)-Ca(1)-O(2)     | 132.46(11) |
| O(5)-Ca(1)-O(2)#3   | 132.46(11) | O(5)-Ca(1)-O(5)#4   | 149.37(18) |
| O(5)#4-Ca(1)-O(2)   | 69.13(12)  | O(5)#4-Ca(1)-O(2)#3 | 69.13(12)  |
| O(3)-Ca(2)-O(3)#8   | 69.54(16)  | O(3)#5-Ca(2)-O(3)   | 152.74(11) |
| O(3)#5-Ca(2)-O(3)#6 | 79.02(19)  | O(3)#5-Ca(2)-O(3)#8 | 99.40(13)  |
| O(3)#5-Ca(2)-O(4)   | 154.37(15) | O(3)#5-Ca(2)-O(4)#8 | 89.93(14)  |
| O(3)#5-Ca(2)-O(6)   | 75.98(12)  | O(3)#5-Ca(2)-O(6)#7 | 81.30(14)  |
| O(3)#6-Ca(2)-O(3)   | 99.40(13)  | O(3)#6-Ca(2)-O(3)#8 | 152.74(11) |
| O(3)#6-Ca(2)-O(4)   | 89.93(14)  | O(3)#6-Ca(2)-O(4)#8 | 154.37(15) |
| O(3)#6-Ca(2)-O(6)   | 75.98(12)  | O(3)#6-Ca(2)-O(6)#7 | 81.30(14)  |
| O(4)-Ca(2)-O(3)     | 51.56(12)  | O(4)-Ca(2)-O(3)#8   | 100.82(14) |
| O(4)-Ca(2)-O(4)#8   | 90.4(2)    | O(4)-Ca(2)-O(6)     | 78.95(12)  |
| O(4)#8-Ca(2)-O(3)   | 100.82(14) | O(4)#8-Ca(2)-O(3)#8 | 51.56(12)  |
| O(4)#8-Ca(2)-O(6)   | 78.95(12)  | O(6)-Ca(2)-O(3)     | 130.46(11) |
| O(6)-Ca(2)-O(3)#8   | 130.46(11) | O(6)#7-Ca(2)-O(3)   | 71.61(13)  |
| O(6)#7-Ca(2)-O(3)#8 | 71.61(13)  | O(6)#7-Ca(2)-O(4)   | 120.11(13) |
| O(6)#7-Ca(2)-O(4)#8 | 120.11(12) | O(6)#7-Ca(2)-O(6)   | 150.39(17) |

Symmetry codes: #1: -x+1, -y+2, z-1/2; #2: x, -y+2, z-1/2; #3: -x+1, y, z; #4: -x+1, -y+2, z+1/2;

#5: -x+2, -y+1, z+1/2; #6: x, -y+1, z+1/2; #7: -x+2, -y+1, z-1/2; #8: -x+2, y, z.

**Table S4** Selected bond lengths(Å) and angles(°) for **3**.

|                     |            |                     |            |
|---------------------|------------|---------------------|------------|
| Sr(1)-O(1)          | 2.506(5)   | Sr(1)-O(1)#1        | 2.506(5)   |
| Sr(1)-O(1)#2        | 2.706(6)   | Sr(1)-O(1)#3        | 2.706(6)   |
| Sr(1)-O(2)#2        | 2.561(6)   | Sr(1)-O(2)#3        | 2.561(6)   |
| Sr(1)-O(3)          | 2.627(8)   | Sr(1)-O(3)#4        | 2.566(8)   |
| O(1)-Sr(1)-O(1)#1   | 78.0(3)    | O(1)-Sr(1)-O(1)#2   | 153.56(13) |
| O(1)-Sr(1)-O(1)#3   | 99.3(2)    | O(1)-Sr(1)-O(2)#2   | 154.9(2)   |
| O(1)-Sr(1)-O(2)#3   | 90.2(2)    | O(1)-Sr(1)-O(3)     | 83.8(2)    |
| O(1)-Sr(1)-O(3)#4   | 73.94(19)  | O(1)#1-Sr(1)-O(1)#2 | 99.3(2)    |
| O(1)#1-Sr(1)-O(1)#3 | 153.56(13) | O(1)#1-Sr(1)-O(2)#2 | 90.2(2)    |
| O(1)#1-Sr(1)-O(2)#3 | 154.9(2)   | O(1)#1-Sr(1)-O(3)   | 83.8(2)    |
| O(1)#1-Sr(1)-O(3)#4 | 73.94(19)  | O(1)#2-Sr(1)-O(1)#3 | 71.3(3)    |
| O(2)#2-Sr(1)-O(1)#2 | 49.67(18)  | O(2)#2-Sr(1)-O(1)#3 | 100.8(2)   |
| O(2)#2-Sr(1)-O(2)#3 | 91.5(4)    | O(2)#2-Sr(1)-O(3)   | 117.19(18) |
| O(2)#2-Sr(1)-O(3)#4 | 81.60(19)  | O(2)#3-Sr(1)-O(1)#2 | 100.8(2)   |
| O(2)#3-Sr(1)-O(1)#3 | 49.67(18)  | O(2)#3-Sr(1)-O(3)   | 117.19(18) |
| O(2)#3-Sr(1)-O(3)#4 | 81.60(19)  | O(3)-Sr(1)-O(1)#2   | 69.77(18)  |
| O(3)-Sr(1)-O(1)#3   | 69.77(18)  | O(3)#4-Sr(1)-O(1)#2 | 131.12(16) |
| O(3)#4-Sr(1)-O(1)#3 | 131.12(16) | O(3)#4-Sr(1)-O(3)   | 151.2(2)   |

Symmetry codes: #1: x, -y+3/2, z; #2: x+1/2, -y+3/2, -z+1/2; #3: x+1/2, y, -z+1/2; #4: x-1/2, y, -z+1/2;

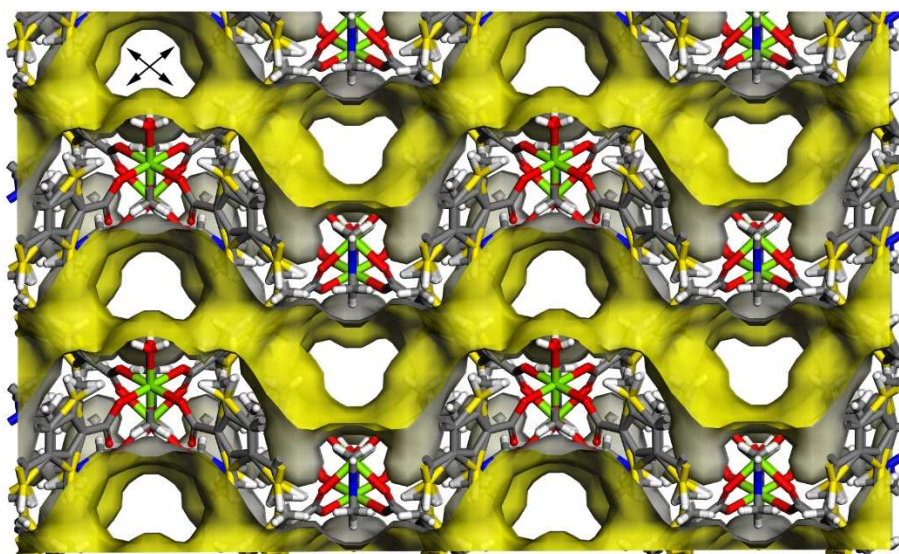

**Fig. S1** View of the 3D framework and channel structure of **1** along the *c*-axis; 1D channel with an effective pore size of approximately  $4.9 \times 4.9 \text{ \AA}^2$ .

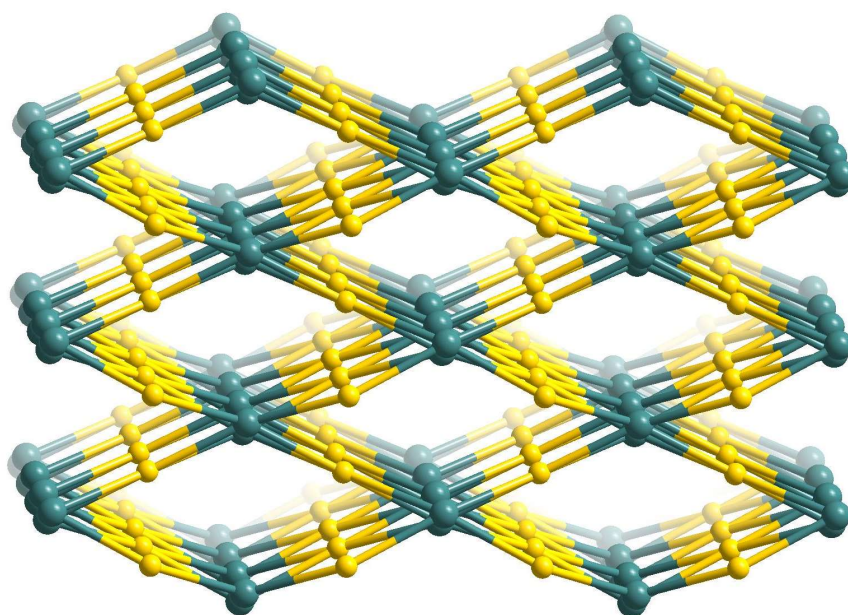

**Fig. S2** Topological representation of the 4-connected lvt net of **3**.

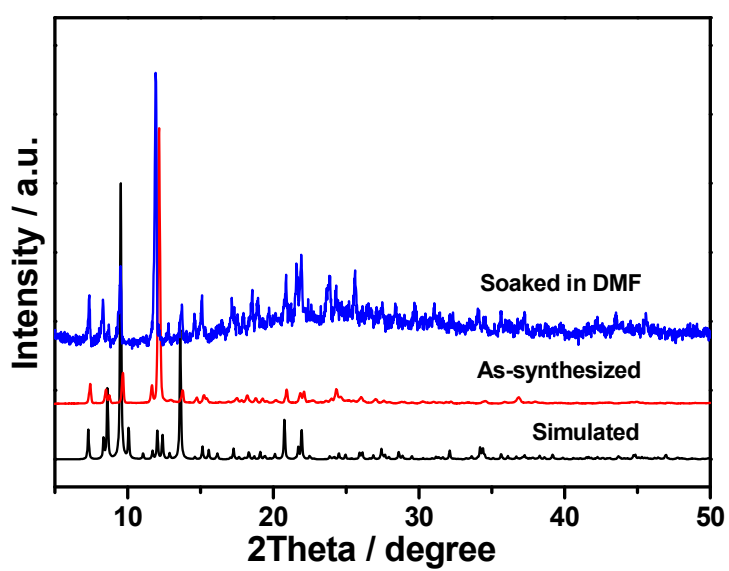

**Fig. S3** PXRD patterns of **1** and **1** after soaking in DMF for 2 days.

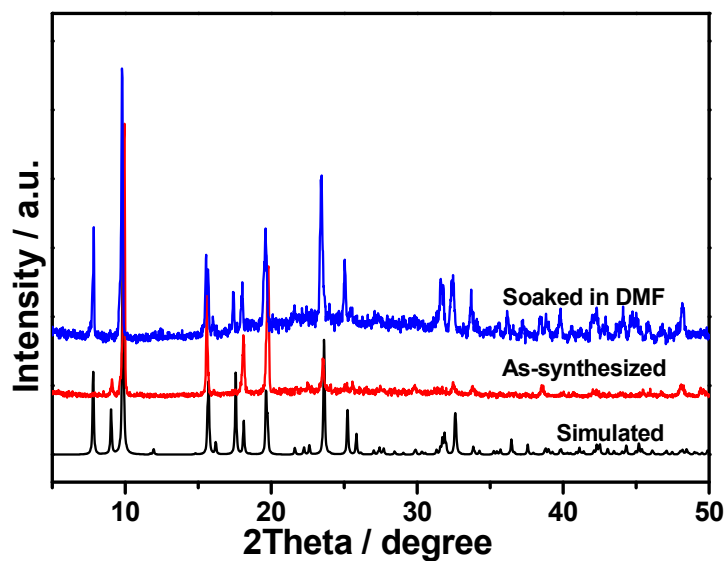

**Fig. S4** PXRD patterns of **2** and **2** after soaking in DMF for 2 days. The differences of peak intensity between the simulated and as-synthesized patterns may be due to the preferred orientation of the powder samples.<sup>[1]</sup>

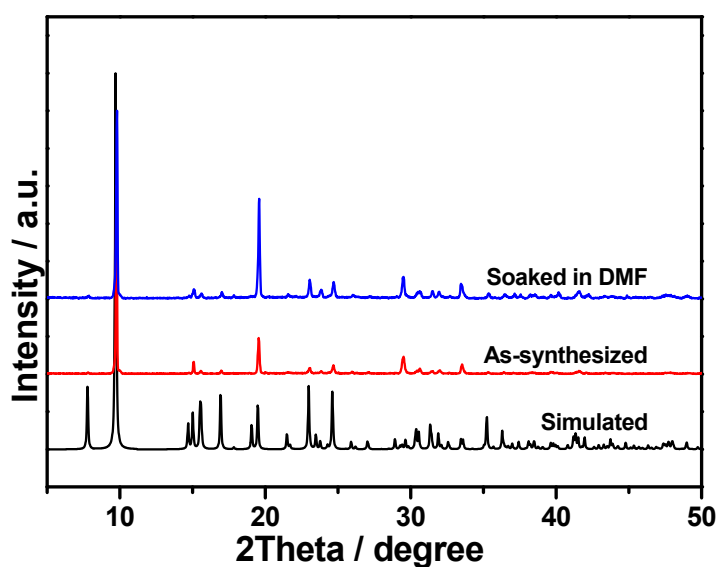

**Fig. S5** PXRD patterns of **3** and **3** after soaking in DMF for 2 days.

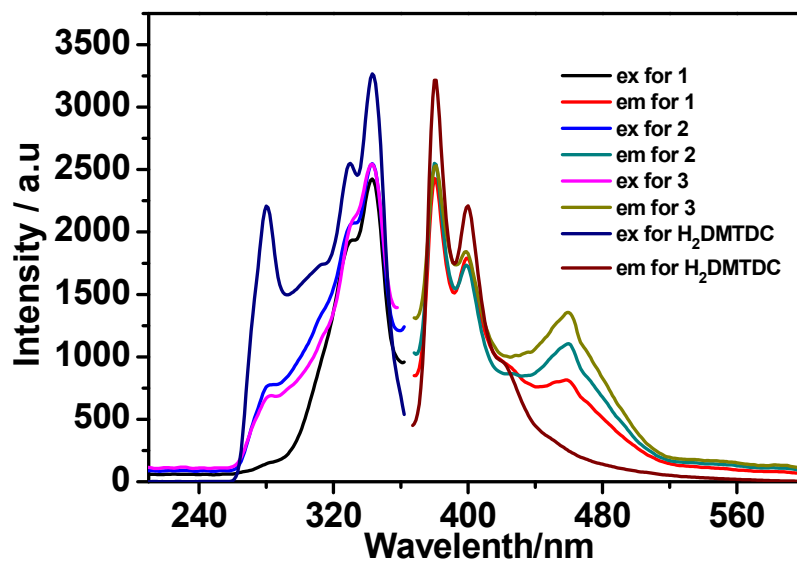

**Fig. S6** The excitation and emission spectra of the ligand H<sub>2</sub>DMTDC, **1**, **2** and **3** (dispersed) in DMF.

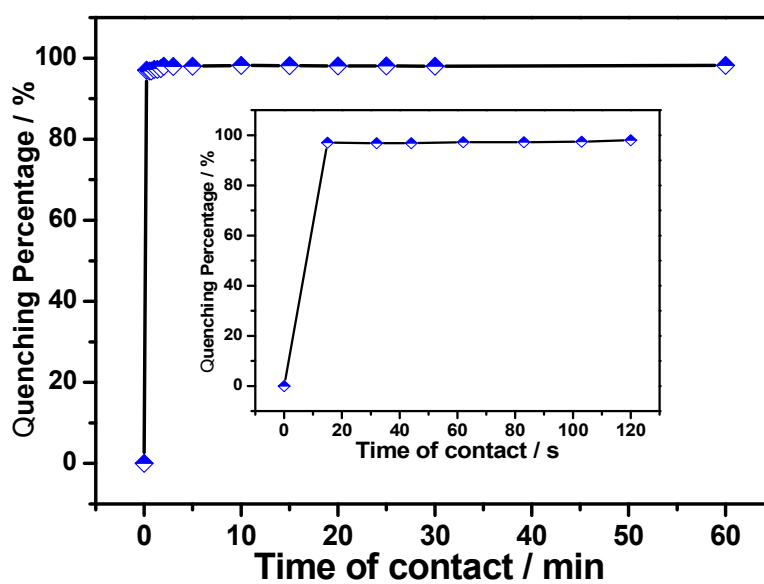

**Fig. S7** Time-dependent fluorescence quenching by Fe<sup>3+</sup> of **2**



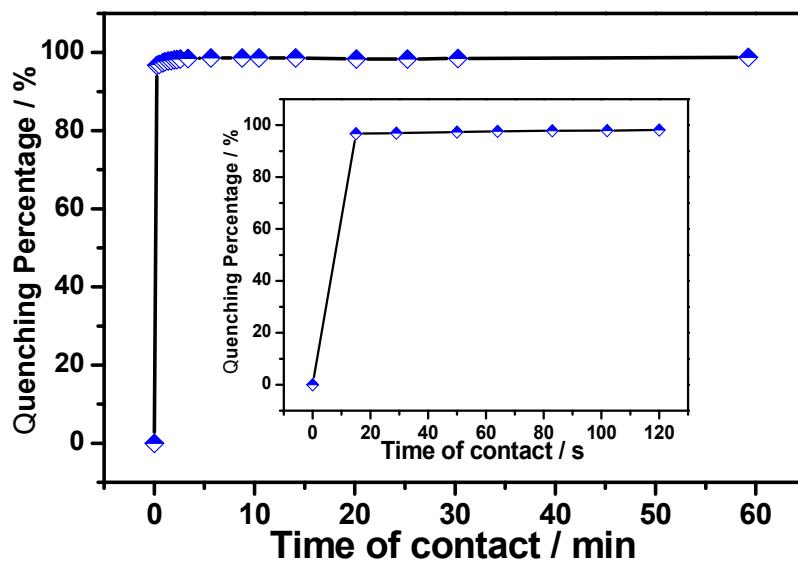

Fig. S8 Time-dependent fluorescence quenching by  $\text{Fe}^{3+}$  of 3

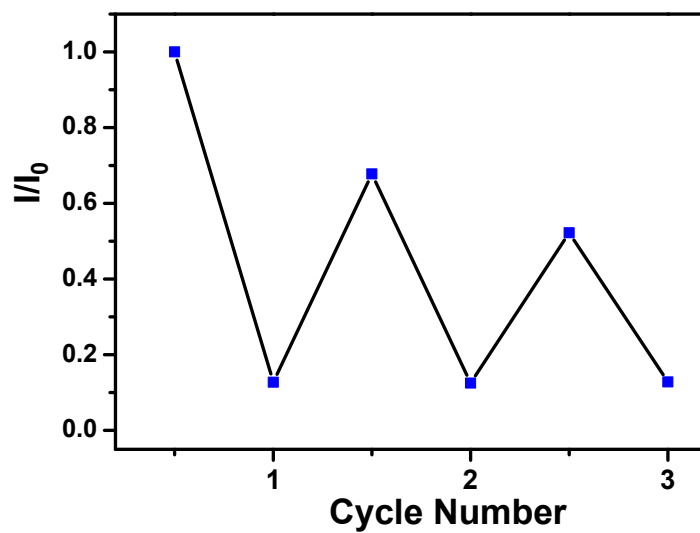

**Fig. S9** Recyclability tests of **1** in the presence of  $\text{Fe}^{3+}$  washed only with DMF

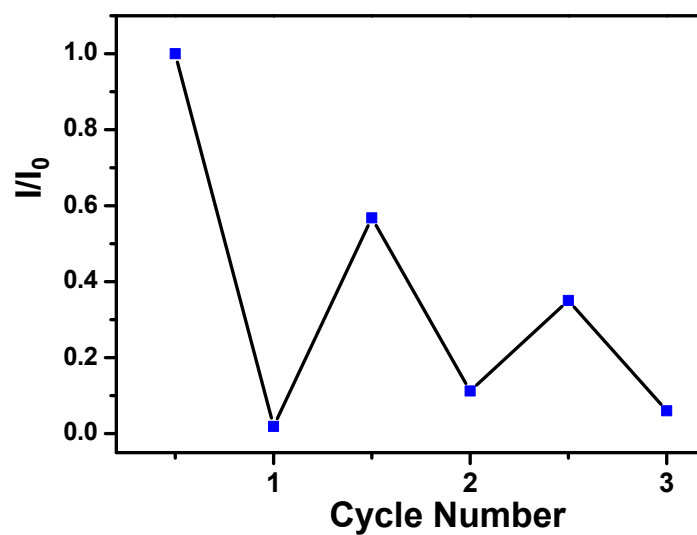

**Fig. S10** Recyclability tests of **2** in the presence of  $\text{Fe}^{3+}$  washed only with DMF

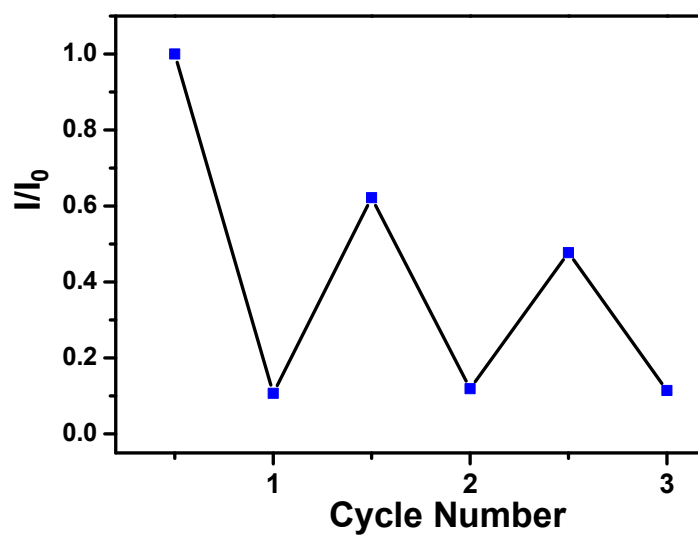

**Fig. S11** Recyclability tests of **3** in the presence of  $\text{Fe}^{3+}$  washed only with DMF

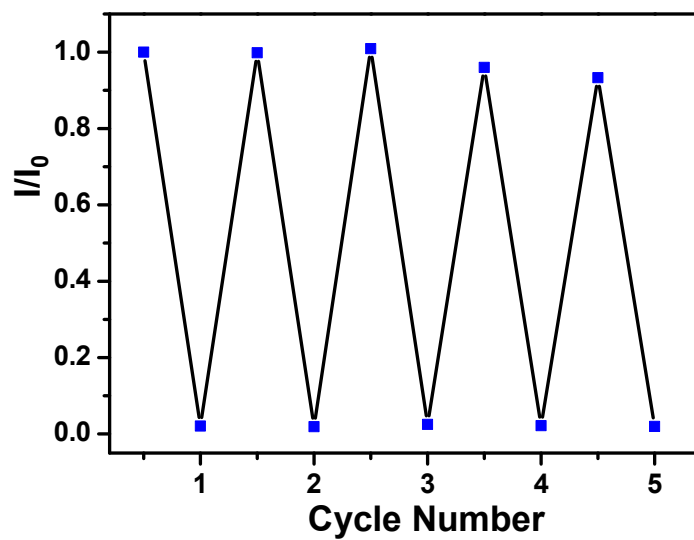

**Fig. S12** Recyclability tests of **2** in the presence of Fe<sup>3+</sup>

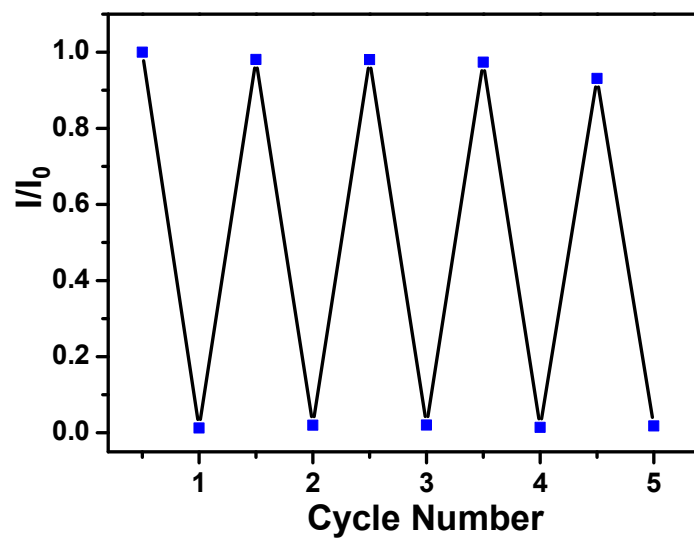

**Fig. S13** Recyclability tests of **3** in the presence of Fe<sup>3+</sup>

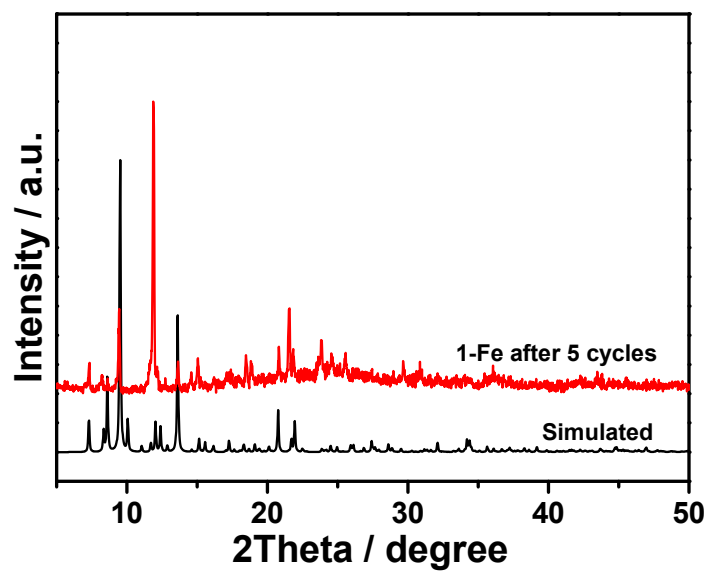

Fig. S14 XRD patterns of 1 after 5 cycles for sensing Fe<sup>3+</sup>

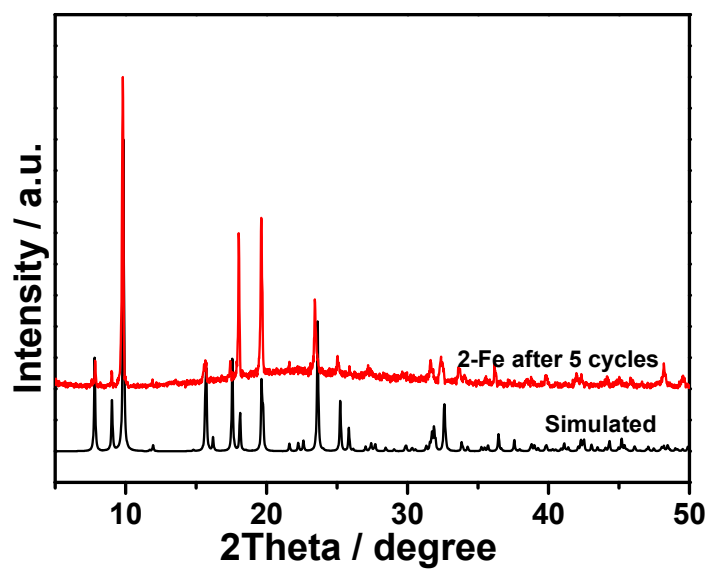

Fig. S15 XRD patterns of 2 after 5 cycles for sensing Fe<sup>3+</sup>

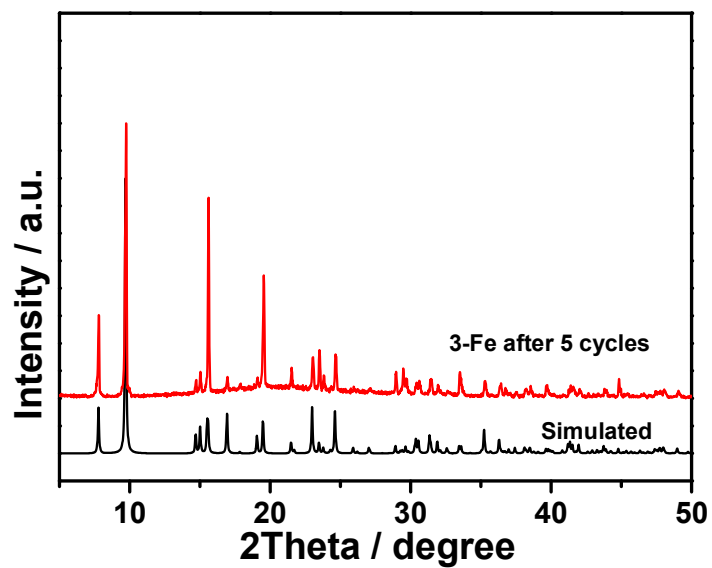

Fig. S16 XRD patterns of **3** after 5 cycles for sensing  $\text{Fe}^{3+}$

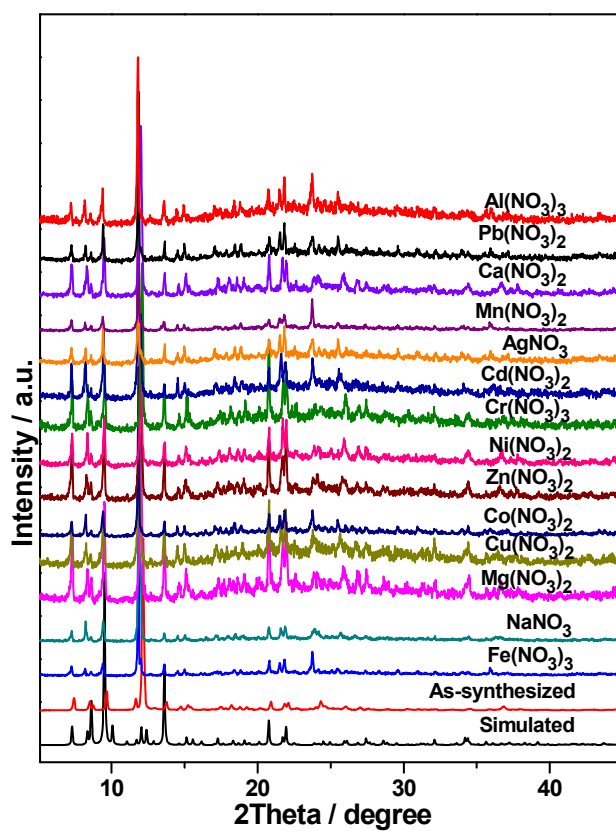

Fig. S17 PXRD of **1** after soaking different metal ions for 24 hrs in DMF

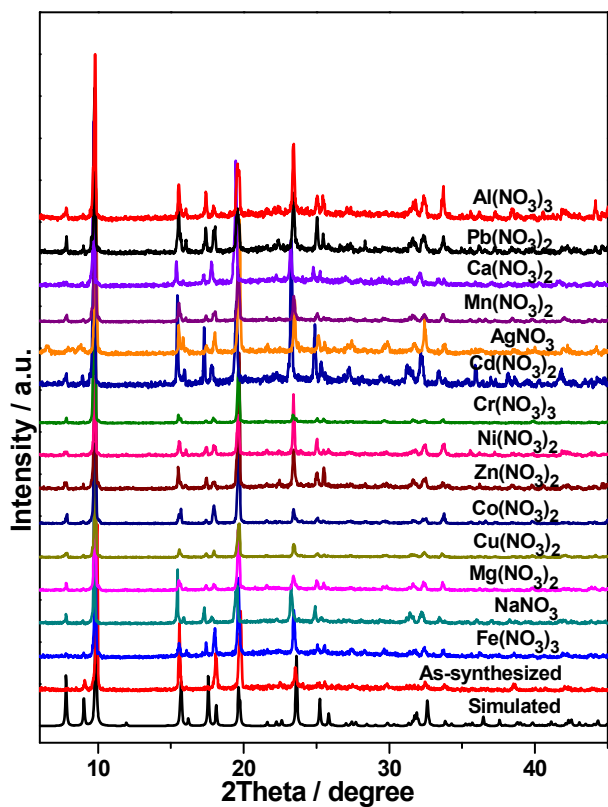

Fig. S18 PXRD of 2 after soaking different metal ions for 24 hrs in DMF

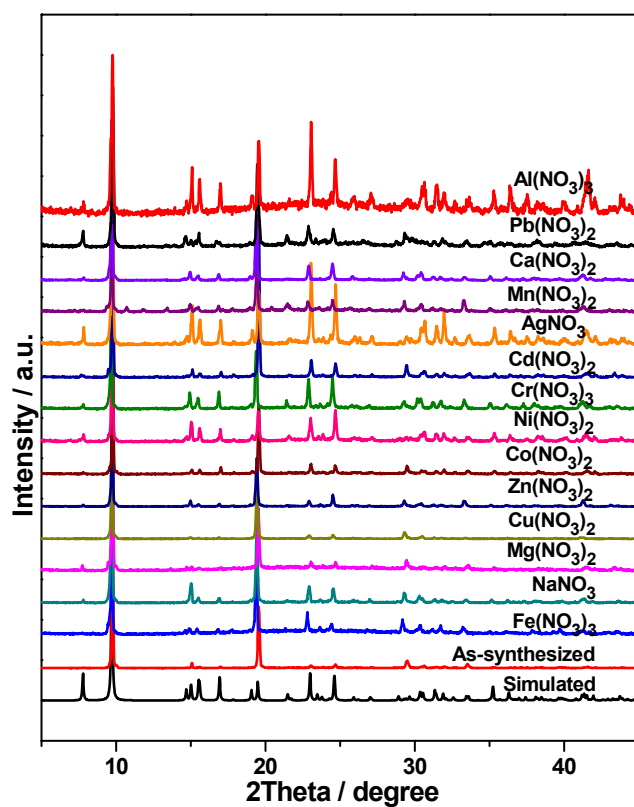

Fig. S19 PXRD of 3 after soaking different metal ions for 24 hrs in DMF

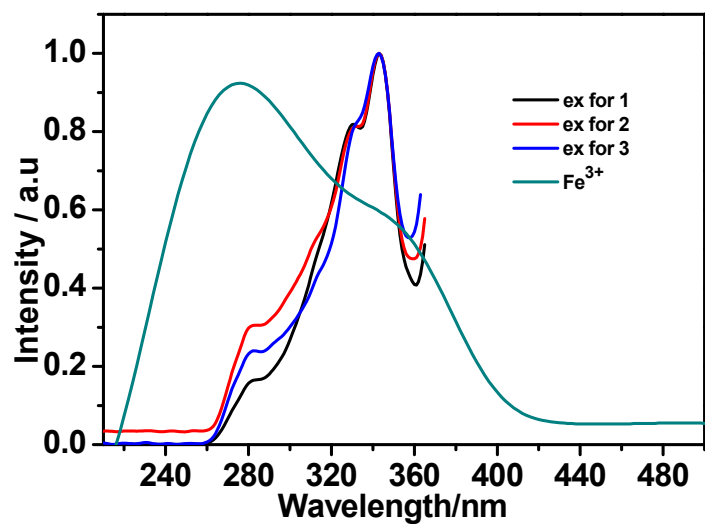

**Fig. S20** The excitation spectra of **1**, **2** and **3** (dispersed in DMF) and UV-vis absorption spectrum of and Fe(NO<sub>3</sub>)<sub>3</sub> in DMF

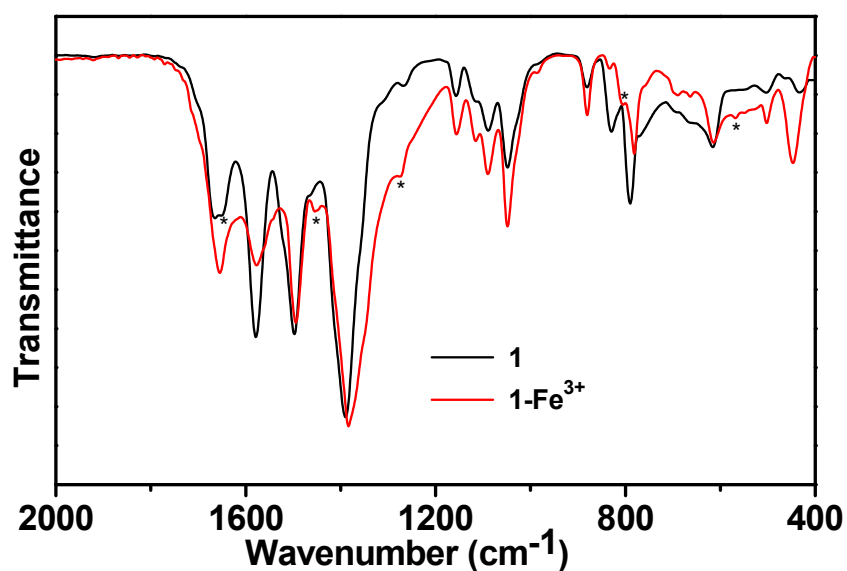

**Fig. S21** FT-IR spectra of **1** before and after immersion in Fe(NO<sub>3</sub>)<sub>3</sub> solutions of DMF(the changes are marked by an asterisk).

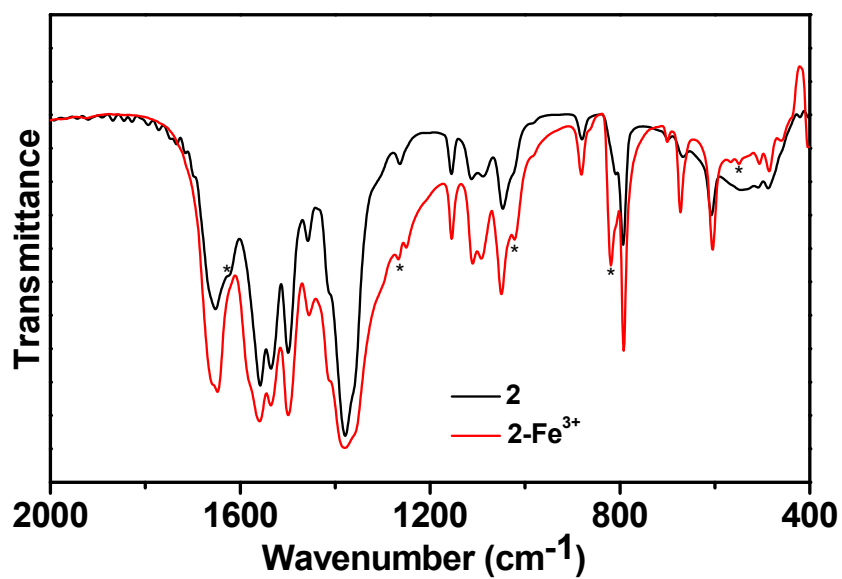

**Fig. S22** FT-IR spectra of **2** before and after immersion in Fe(NO<sub>3</sub>)<sub>3</sub> solutions of DMF(the changes are marked by an asterisk).

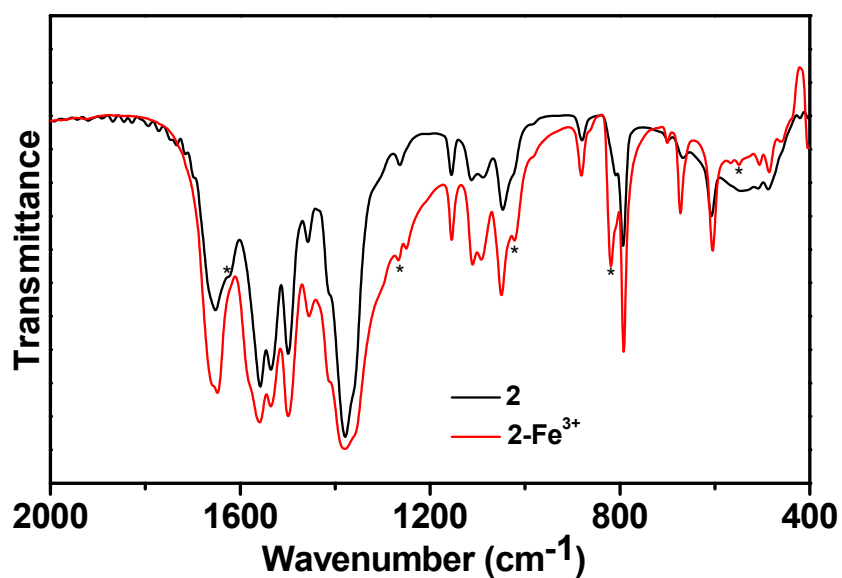

**Fig. S23** FT-IR spectra of **3** before and after immersion in Fe(NO<sub>3</sub>)<sub>3</sub> solutions of DMF(the changes are marked by an asterisk).



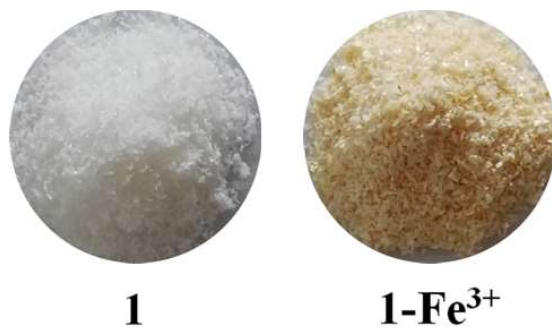

**Fig. S24** The photographs of **1** and Fe<sup>3+</sup>-incorporated **1**

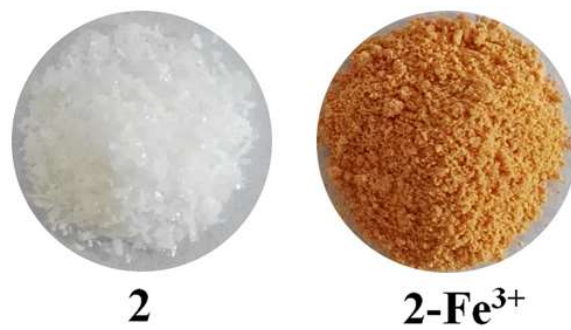

**Fig. S25** The photographs of **2** and Fe<sup>3+</sup>-incorporated **2**

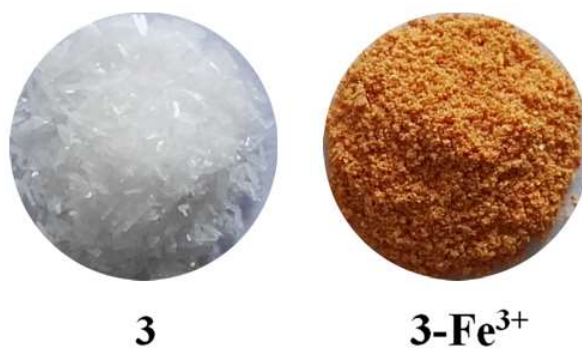

**Fig. S26** The photographs of **3** and Fe<sup>3+</sup>-incorporated **3**

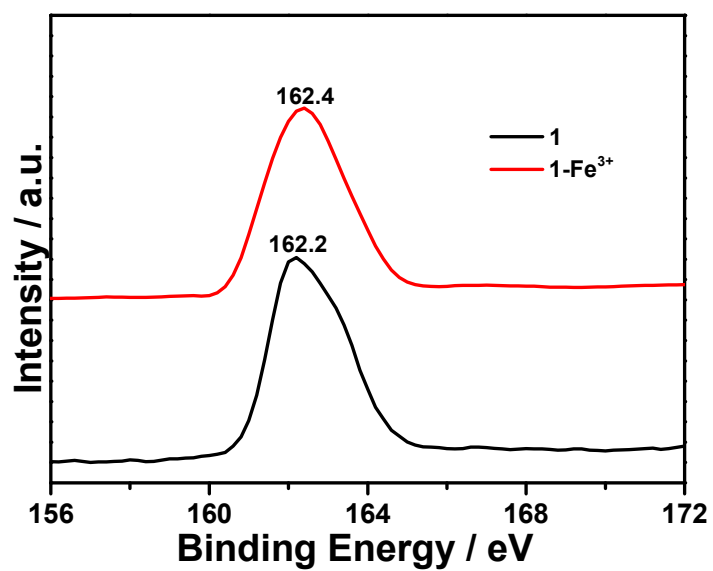

Fig. S27 S2p XPS spectra of **1** before (black) and Fe<sup>3+</sup>-incorporated **1** (red)

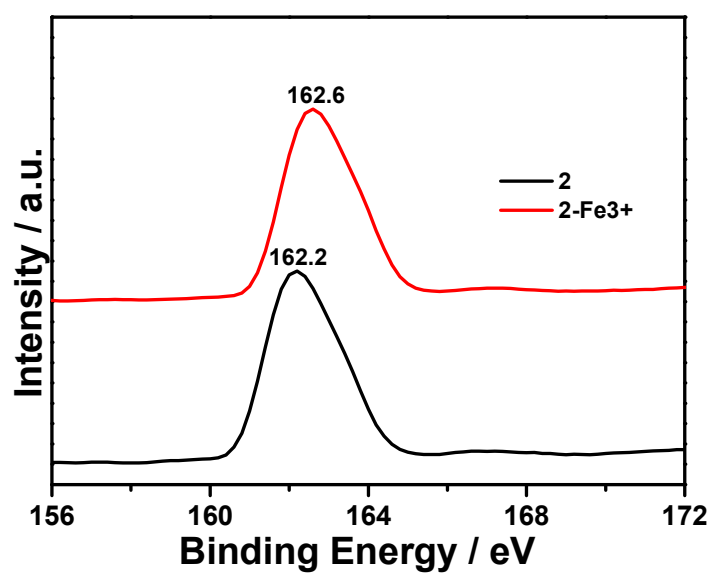

Fig. S28 S2p XPS spectra of **2** before (black) and Fe<sup>3+</sup>-incorporated **2** (red)

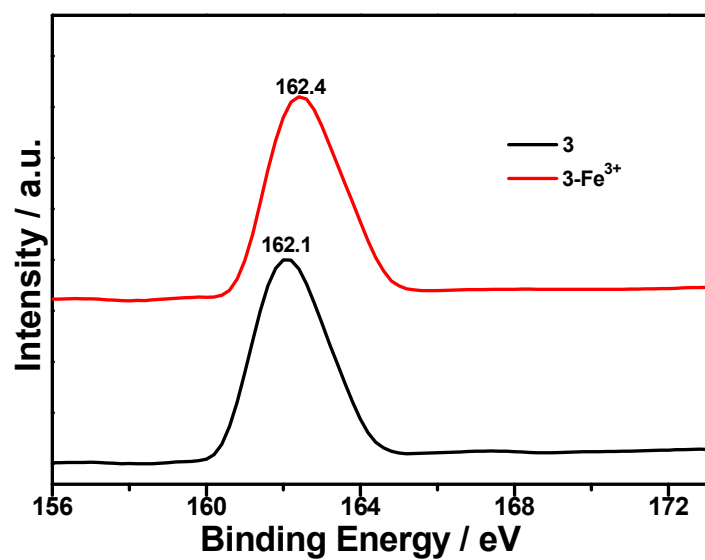

Fig. S29 S2p XPS spectra of **3** before (black) and Fe<sup>3+</sup>-incorporated **3** (red)

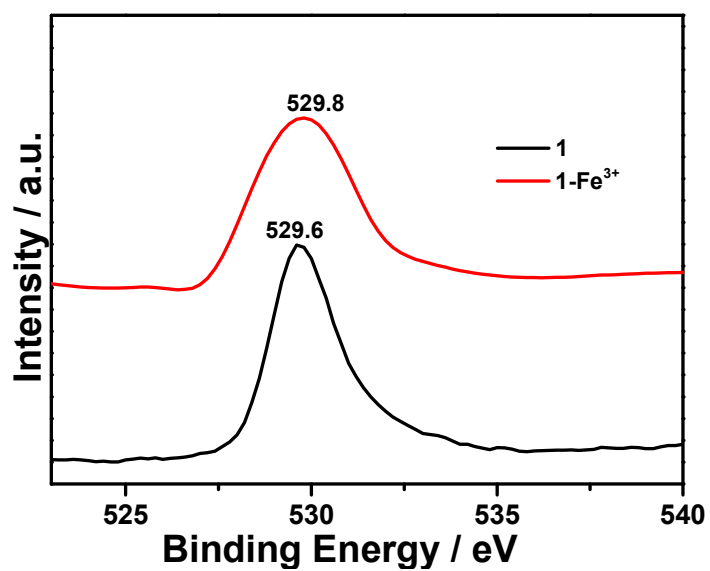

Fig. S30 O1s XPS spectra of **1** before and after immersed in Fe<sup>3+</sup>

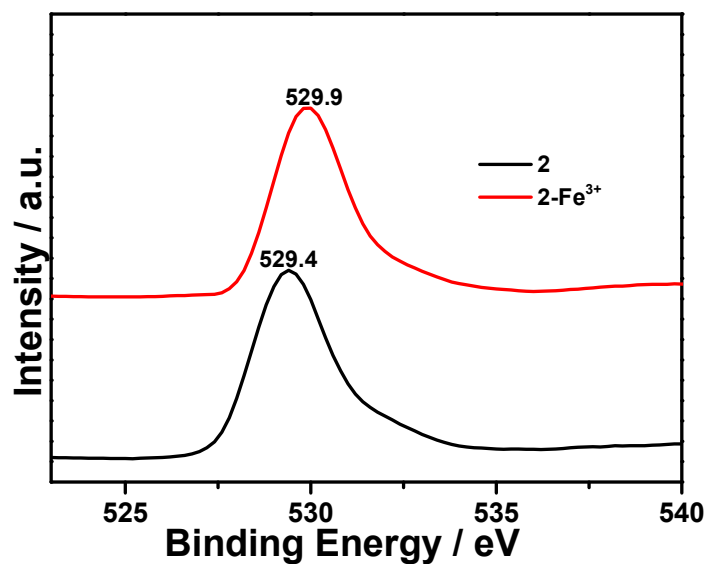

Fig. S31 O1s XPS spectra of **2** before (black) and Fe<sup>3+</sup>-incorporated **2** (red)

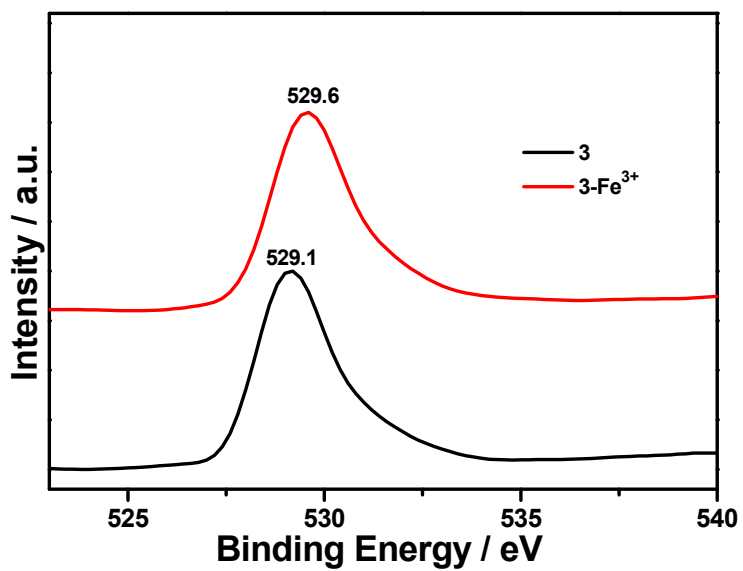

Fig. S32 O1s XPS spectra of **3** before (black) and Fe<sup>3+</sup>-incorporated **3** (red)

**Table S5** The comparison among various fluorescent materials used for detecting Fe<sup>3+</sup>

| Fluorescent materials                                                                                                                                                     | Media<br>(aqueous /<br>organic) | Quenching<br>constant<br><i>K</i> <sub>sv</sub> (M <sup>-1</sup> ) | Detection<br>limit<br>LOD (M) | Ref.      |
|---------------------------------------------------------------------------------------------------------------------------------------------------------------------------|---------------------------------|--------------------------------------------------------------------|-------------------------------|-----------|
| Mg-CP                                                                                                                                                                     | H <sub>2</sub> O                | 1.54 × 10 <sup>3</sup>                                             | /                             | 2         |
| [MgZn(1,4-NDC) <sub>2</sub> (DMF) <sub>2</sub>                                                                                                                            | EtOH                            | 5.0 × 10 <sup>4</sup>                                              | /                             | 3         |
| [Ca <sub>1.5</sub> (μ <sub>8</sub> -HL)(DMF)] <sub>n</sub>                                                                                                                | H <sub>2</sub> O                | 7.28 × 10 <sup>4</sup>                                             | 5.91 × 10 <sup>-6</sup>       | 4         |
| {[Mg <sub>1.5</sub> (μ <sub>7</sub> -HL)·(H <sub>2</sub> O) <sub>2</sub> ]·3H <sub>2</sub> O} <sub>n</sub>                                                                | H <sub>2</sub> O                | 3.38 × 10 <sup>4</sup>                                             | 2.20 × 10 <sup>-5</sup>       | 4         |
| [CH <sub>3</sub> -dpb] <sub>2</sub> [Mg <sub>3</sub> (1,4-NDC) <sub>4</sub> (μ-H <sub>2</sub> O) <sub>2</sub> (CH <sub>3</sub> OH)(H <sub>2</sub> O)]·1.5H <sub>2</sub> O | EtOH                            | 1.6 × 10 <sup>4</sup>                                              | 4.7 × 10 <sup>-4</sup>        | 5         |
| {[Ca <sub>3</sub> L <sub>2</sub> (H <sub>2</sub> O) <sub>6</sub> ]·2H <sub>2</sub> O} <sub>n</sub>                                                                        | H <sub>2</sub> O                | 3737.8                                                             | 1.04 × 10 <sup>-3</sup>       | 6         |
| {[Mg <sub>2</sub> (μ <sub>6</sub> -L)(μ <sub>2</sub> -OH <sub>2</sub> )(H <sub>2</sub> O) <sub>4</sub> ]·DMF} <sub>n</sub>                                                | H <sub>2</sub> O                | 2.405 × 10 <sup>3</sup>                                            | 1.68 × 10 <sup>-3</sup>       | 7         |
| [Ca <sub>2</sub> (μ <sub>10</sub> -L)(EtOH)] <sub>n</sub>                                                                                                                 | H <sub>2</sub> O                | 2.342 × 10 <sup>3</sup>                                            | 1.70 × 10 <sup>-3</sup>       | 7         |
| [Sr(μ <sub>6</sub> -H <sub>2</sub> L)(MeOH)] <sub>n</sub>                                                                                                                 | H <sub>2</sub> O                | 3.377 × 10 <sup>3</sup>                                            | 7.47 × 10 <sup>-4</sup>       | 7         |
| {[Ba <sub>1.5</sub> (μ <sub>5</sub> -H <sub>2</sub> L)(μ <sub>4</sub> -H <sub>3</sub> L)(H <sub>2</sub> O) <sub>3</sub> ]·2(H <sub>2</sub> O)} <sub>n</sub>               | H <sub>2</sub> O                | 2.643 × 10 <sup>3</sup>                                            | 1.62 × 10 <sup>-3</sup>       | 7         |
| [Mg <sub>2</sub> Zn <sub>2</sub> (OH) <sub>2</sub> (1,4-NDC) <sub>3</sub> (H <sub>2</sub> O) <sub>2</sub> ]·6H <sub>2</sub> O                                             | EtOH                            | 1.7 × 10 <sup>4</sup>                                              | 2.5 × 10 <sup>-4</sup>        | 8         |
| [Mg <sub>2</sub> (DMTDC) <sub>2</sub> (DMF) <sub>3</sub> (H <sub>2</sub> O) <sub>2</sub> ]·2DMF·2H <sub>2</sub> O                                                         | DMF                             | 8.1 × 10 <sup>4</sup>                                              | 4.9 × 10 <sup>-5</sup>        | This work |
| Ca(DMTDC)(DMF)]                                                                                                                                                           | DMF                             | 6.9 × 10 <sup>4</sup>                                              | 2.0 × 10 <sup>-4</sup>        | This work |
| [Sr(DMTDC)(DMF)]                                                                                                                                                          | DMF                             | 2.9 × 10 <sup>4</sup> M                                            | 3.7 × 10 <sup>-4</sup>        | This work |

Note: Detection limit is obtained from the ratio of 3δ/slope, in which δ is the standard deviation of luminescent intensity of blank solution.

## References

- (a) A. Gilbert and J. Baggott, *Essentials of Molecular Photochemistry*, CRC Press, Boca Raton, FL, 1991; (b) Y. Wang, P. Chen, J. Li, J. Yu, J. Xu, Q. Pan, R. Xu, *Inorg. Chem.*, 2006, **45**, 4764.
- Y. Liu, J. Xu, X. Y. Tang, Y. S. Ma, R. X. Yuan and R. Matsuda, *Chem. Lett.*, 2019, **48**, 156.
- Z.-F. Wu and X.-Y. Huang, *ChemistrySelect*, 2018, **3**, 4884.
- X. S. Lia, J. D. An, H. M. Zhang, J. J. Liu, Y. Li, G. X. Du, X. X. Wu, L. Fei, J. D. Lacoste, Z. Cai, Y. Y. Liu, J. Z. Huo and B. Ding, *Dyes and Pigments*, 2019, **170**, 107631.
- Z.-F. Wu, L.-K. Gong, and X.-Y. Huang, *Inorg. Chem.*, 2017, **56**, 7397.
- L.-N. Ma, Y.-K. Lu, W.-J. Shi, L. Hou and Y.-Y. Wang, *Inorg. Chem. Comm.*, 2019, **107**, 107490.
- Y. Liu, L.-N. Ma, W.-J. Shi, Y.-K. Lu, L. Hou and Y.-Y. Wang, *J. Solid State Chem.*, 2019, **277**, 636.
- Z.-F. Wu and X.-Y. Huang, *Dalton Trans.*, 2017, **46**, 12597.
